# Supplementary material
Source: MDPI journal article supplement (https://www.mdpi.com/2072-4292/13/6/1217)
Supplement: s1 [file s1]

# Supplementary Materials: Trends in Satellite Earth Observation for Permafrost related Analyses - A Review

Marius Philipp , Andreas Dietz, Sebastian Buchelt and Claudia Kuenzer

## 1. Study and Author Countries

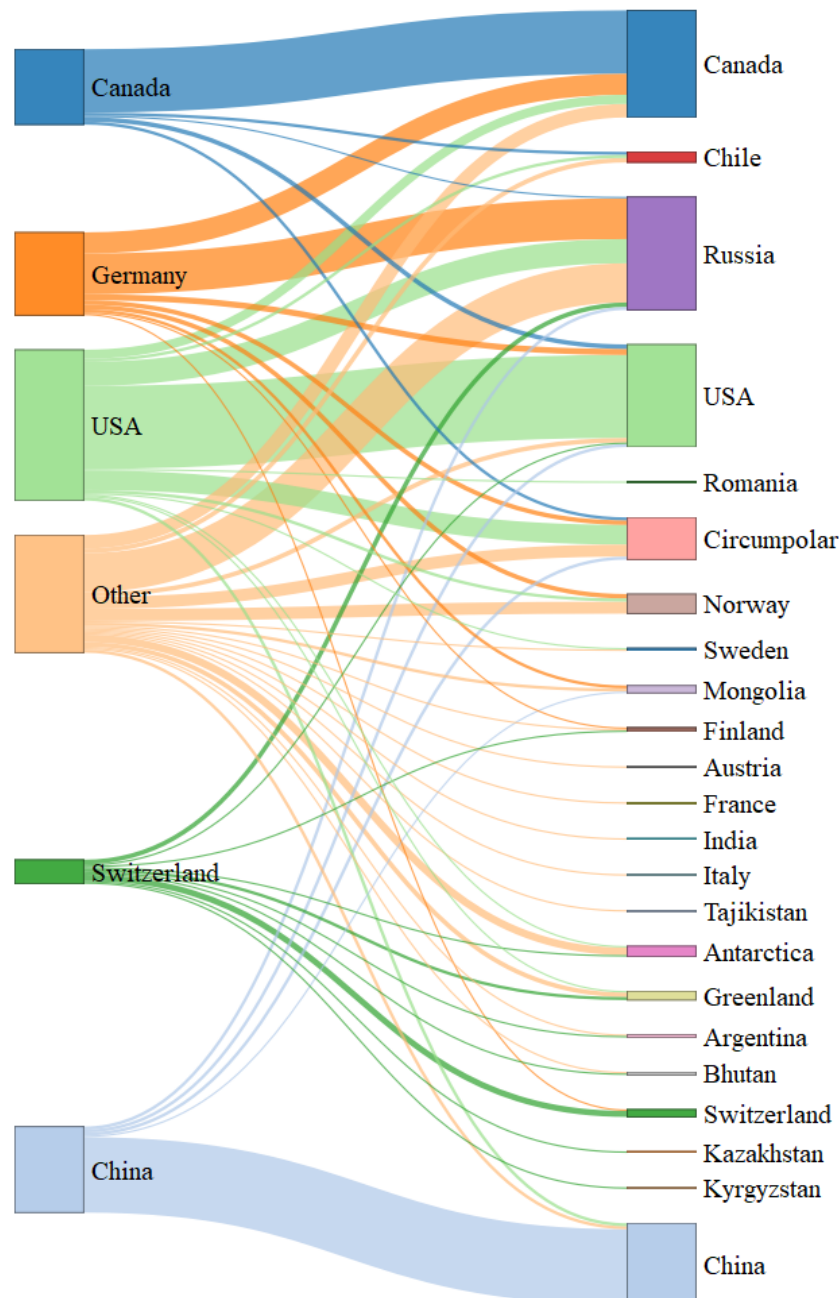

**Figure S1.** Relationship of the first author institution nationality and study country. The left side shows the nationality of the first authors institution and the right side features the studied countries. A trend for authors to investigate the same country as the nationality of the first authors institution can be observed, given that permafrost is present within the authors country.

## 2. Temporal Resolution

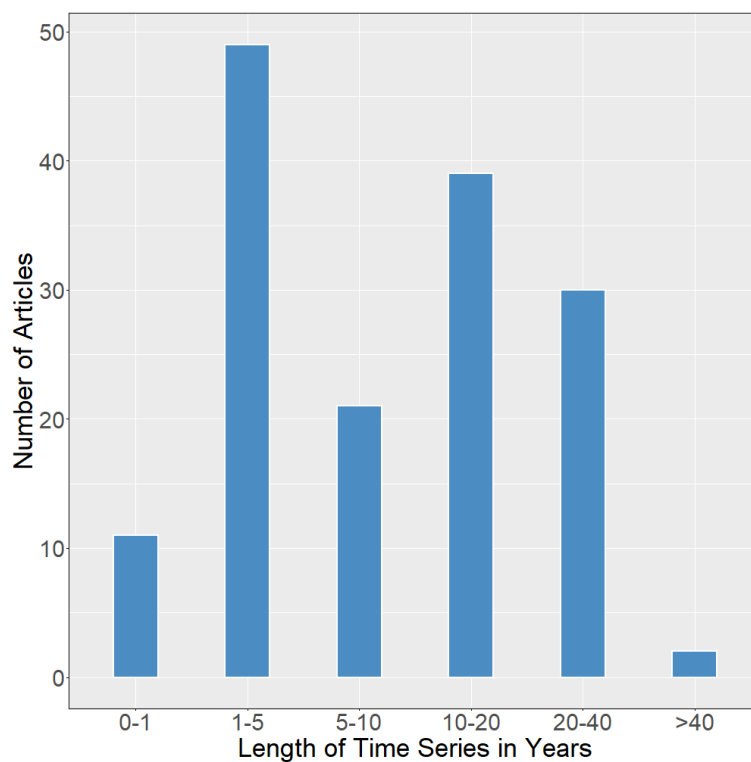

**Figure S2.** Discrete categorization of the time-series length across all reviewed studies that worked with time series data. Most time-series analysis cover a temporal window of 1-5 years.
